# Supplementary material for: Assessing the Vegetation Dynamics and Its Influencing Factors in Central Asia from 2001 to 2020
Source: MDPI journal article supplement (doi:10.3390/rs15194670), 2023-09-23
Supplement: s1 [file s1]

## Supplemental Material

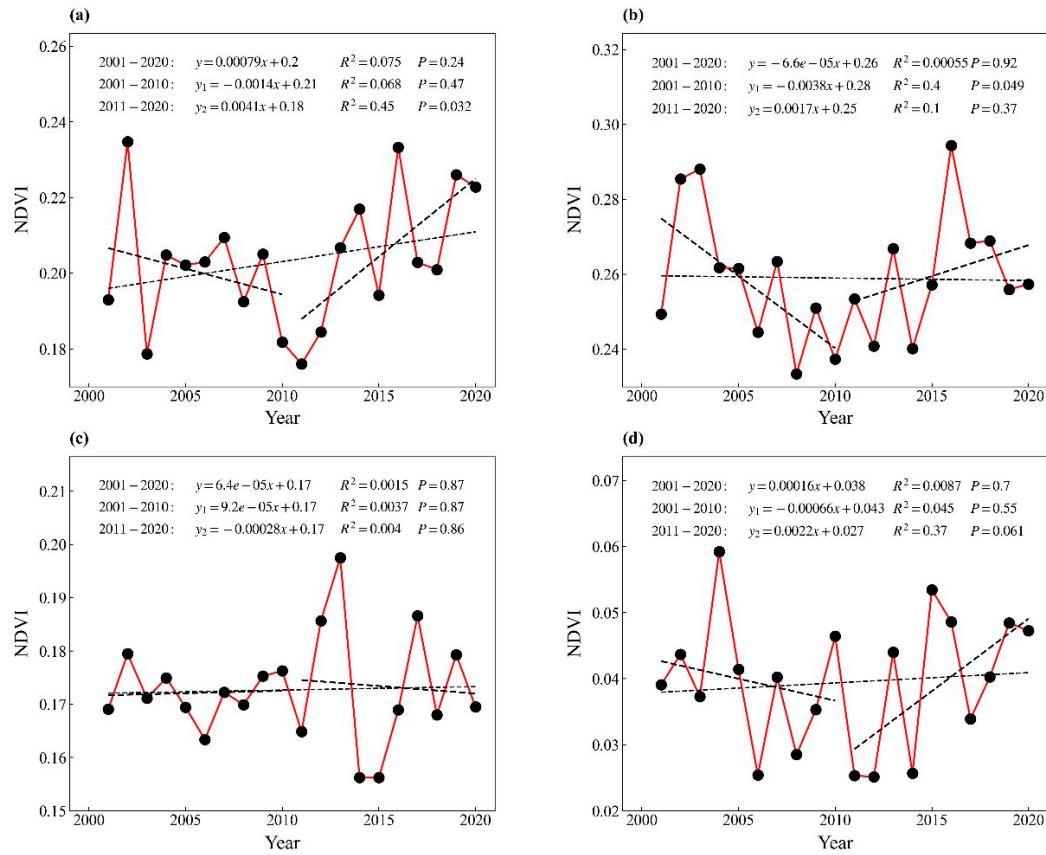

Supplementary Figure S1: Seasonal variation of vegetation in Central Asia from 2001 to 2020. (a), (b), (c), (d) represent the spring, summer, autumn, and winter, respectively.

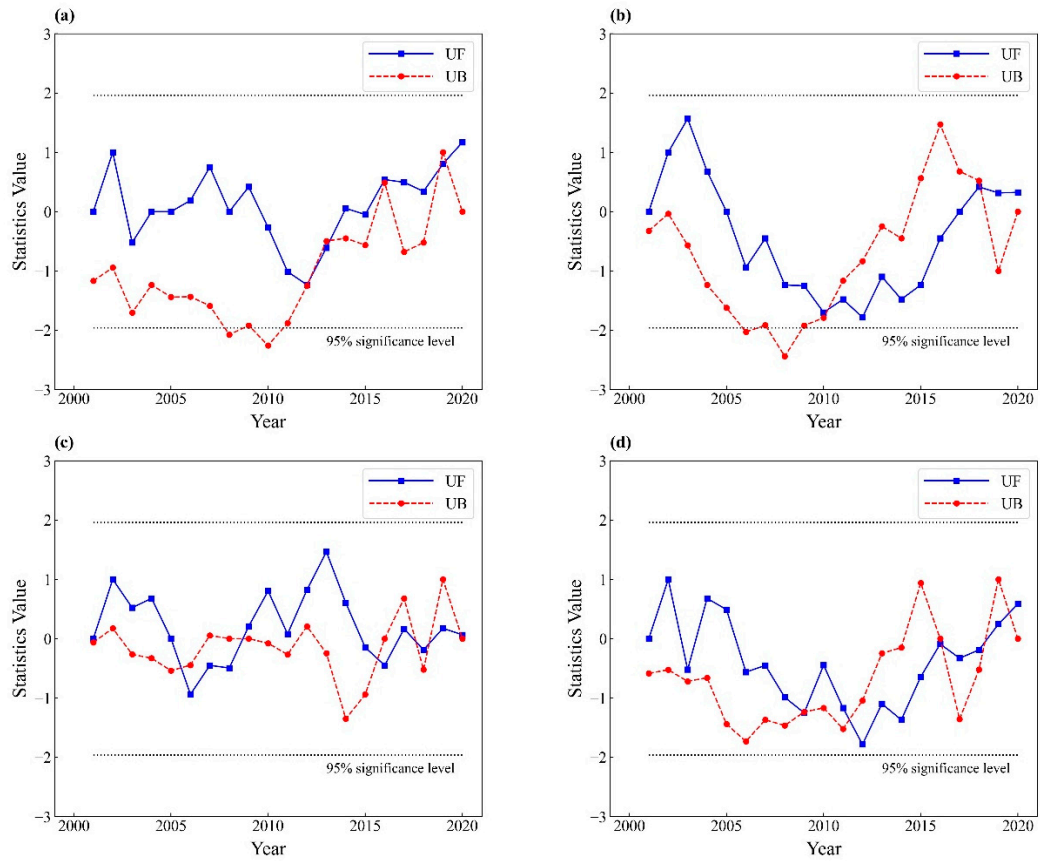

Supplementary Figure S2: Abrupt change point detection for the seasonal NDVI time series. (a), (b), (c), (d) represent the results of spring, summer, autumn, and winter, respectively.

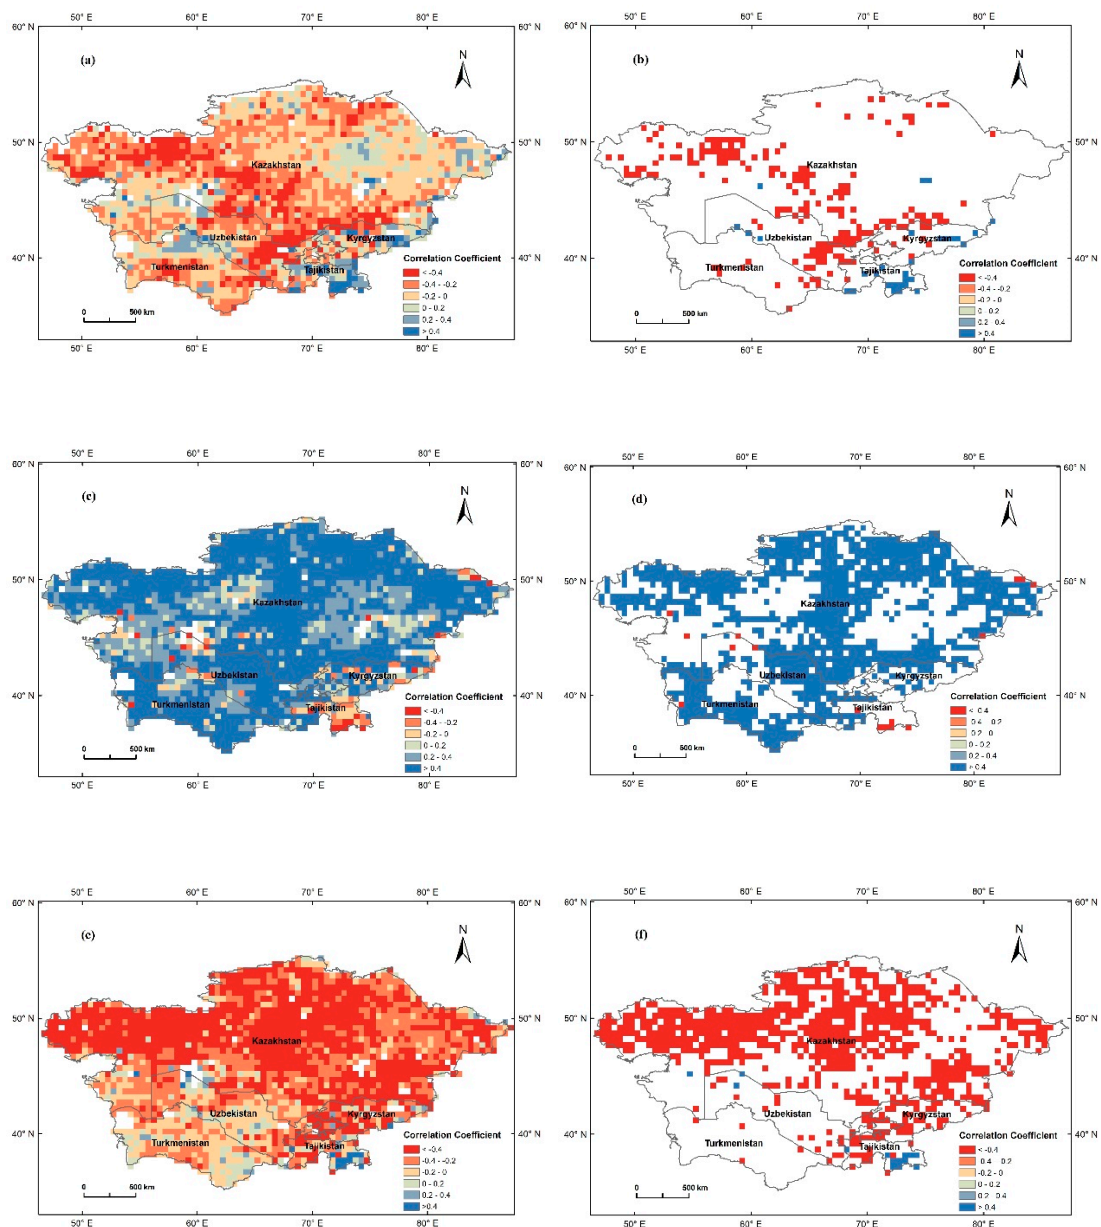

Supplementary Figure S3. Correlation analysis of climate variables and NDVI at pixel level. (a,c,e) represent the correlation of temperature, precipitation and solar radiation, respectively. (b,d,f) represent the significant regions identified by significance test (95%).

Supplementary Table S1. Comprehensive details regarding the data sources for vegetation and the potential driving factors in Central Asia.

| Respects      | Variables                   | Abbreviation | Datasets     | Time Period | Resolution | Download time |
|---------------|-----------------------------|--------------|--------------|-------------|------------|---------------|
| Vegetation    | NDVI                        | NDVI         | MODIS13Q1    | 2001-2020   | 250m       | 2021/12       |
| Climate       | Wind speed                  | Ws           | TerraClimate | 2001-2020   | 1/24°      | 2022/5        |
|               | Vapor pressure deficit      | Vpd          |              |             |            |               |
|               | Precipitation               | Pre          |              |             |            |               |
|               | Soil water content          | Swc          |              |             |            |               |
|               | Maximum temperature         | Tmax         |              |             |            |               |
|               | Minimum temperature         | Tmin         |              |             |            |               |
|               | Average temperature         | Tavg         | CRU          |             | 0.5°       | 2022/6        |
|               | Surface shortwave radiation | Srad         | MERRA-2      |             | 0.5°       | 2022/9        |
| Geographic    | Soil type                   | St           | HWSD         | 2012        | 1km        | 2022/5        |
|               | Land use type               | Lut          | MCD12Q1      | 2001,2020   | 500m       | 2022/5        |
| Anthropogenic | Land use conversion type    | Luct         | MCD12Q1      | /           | 500m       | 2022/5        |
|               | Population                  | Pop          | LandScan     | 2001-2020   | 1km        | 2022/5        |

Supplementary Table S2. Correlation between different NDVI change regions and Precipitation (Pre), Temperature (Tmn), and Radiation (Srad).

| Variation Classes       | Pre  |      | Tmn   |      | Srad  |      |
|-------------------------|------|------|-------|------|-------|------|
|                         | r    | p    | r     | p    | r     | p    |
| Continue decrease       | 0.86 | 0.00 | -0.29 | 0.22 | -0.68 | 0.00 |
| Decrease to<br>increase | 0.68 | 0.00 | -0.37 | 0.11 | -0.60 | 0.00 |
| Increase to decrease    | 0.46 | 0.04 | 0.34  | 0.15 | -0.52 | 0.02 |
| Continue increase       | 0.58 | 0.01 | 0.00  | 0.99 | -0.54 | 0.01 |
